# Supplementary material for: Ibuprofen-loaded electrospun poly(ethylene-co-vinyl alcohol) nanofibers for wound dressing applications
Source: Royal Society of Chemistry journal article supplement (doi:10.1039/d3na00102d), 2023-01-01
Supplement: d3na00102d1.pdf [file d3na00102d1.pdf]

# Supplementary information: Ibuprofen-loaded electrospun poly(ethylene-co-vinyl alcohol) nanofibers for wound dressing applications

Jean Schoeller<sup>1,2</sup>, Karin Wuertz-Kozak<sup>3</sup>, Stephen J. Ferguson<sup>2</sup>, Markus Rottmar<sup>4</sup>, Yvonne Elbs-Glatz<sup>4</sup>, Jonathan Avaro<sup>5</sup>, Michael Chung<sup>6</sup>, and René M. Rossi<sup>1</sup>

<sup>1</sup>Empa, Swiss Federal Laboratories for Materials Science and Technology, Laboratory for Biomimetic Membranes and Textiles, 9014 St. Gallen, Switzerland

<sup>2</sup>ETH Zürich, Institute for Biomechanics, 8093 Zürich, Switzerland

<sup>3</sup>Rochester Institute of Technology (RIT), Department of Biomedical Engineering, Rochester, NY 14623, United States

<sup>4</sup>Empa, Swiss Federal Laboratories for Materials Science and Technology, Laboratory for Biointerfaces, 9014 St. Gallen, Switzerland

<sup>5</sup>Empa, Swiss Federal Laboratories for Materials Science and Technology, Center for X-ray analytics, 8600, Dübendorf, Switzerland

<sup>6</sup>School of Engineering, The University of Edinburgh, King's Buildings, EH9 3JL, Edinburgh, United Kingdom

March 7, 2023

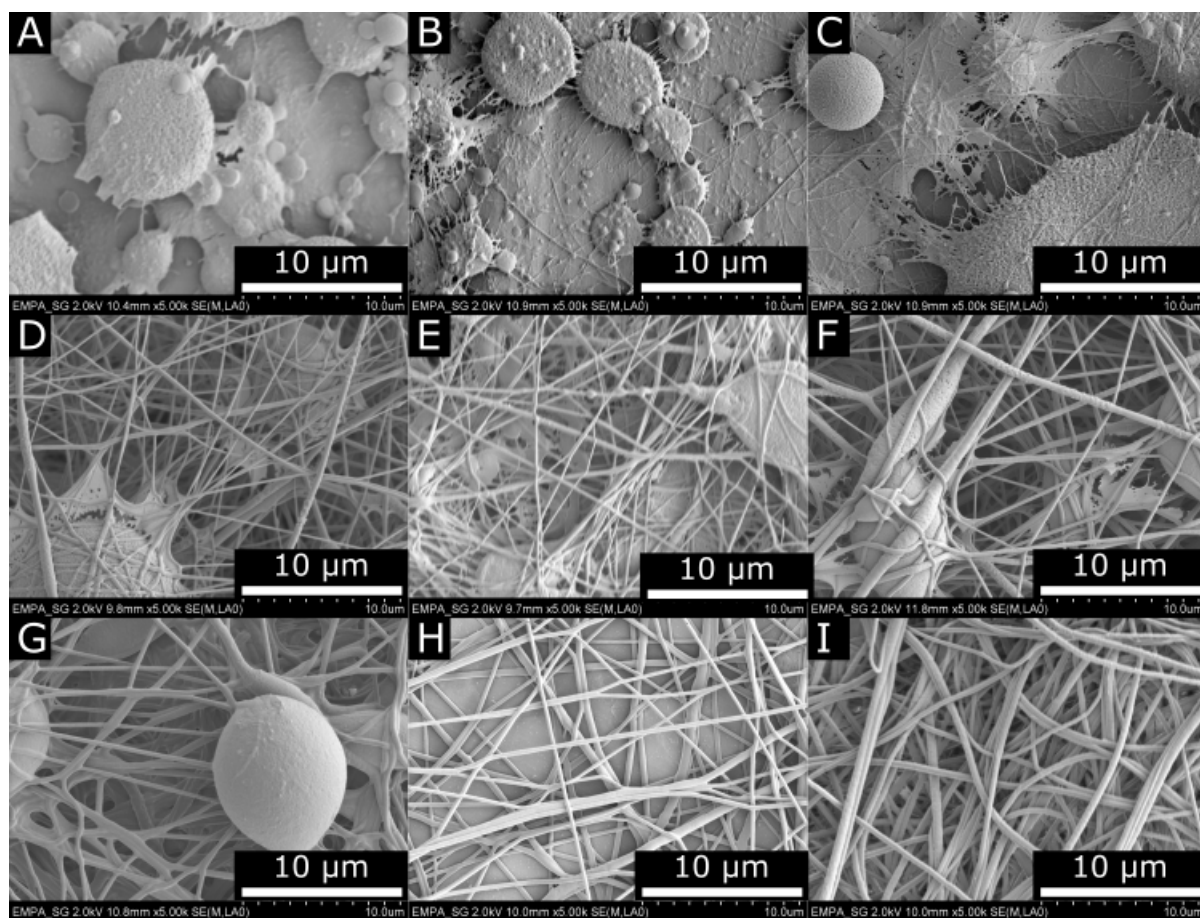

Figure S1: SEM pictures for EVOH32 electrospun nanofibers electrospun at 20 cm, 15/-5kV,  $10 \mu\text{L}\cdot\text{min}^{-1}$  and (A) 4, (B) 6, (C) 8, (D) 10, (E) 12, (F) 14, (G) 16, (H) 18 and (I) the fibers used in this study.

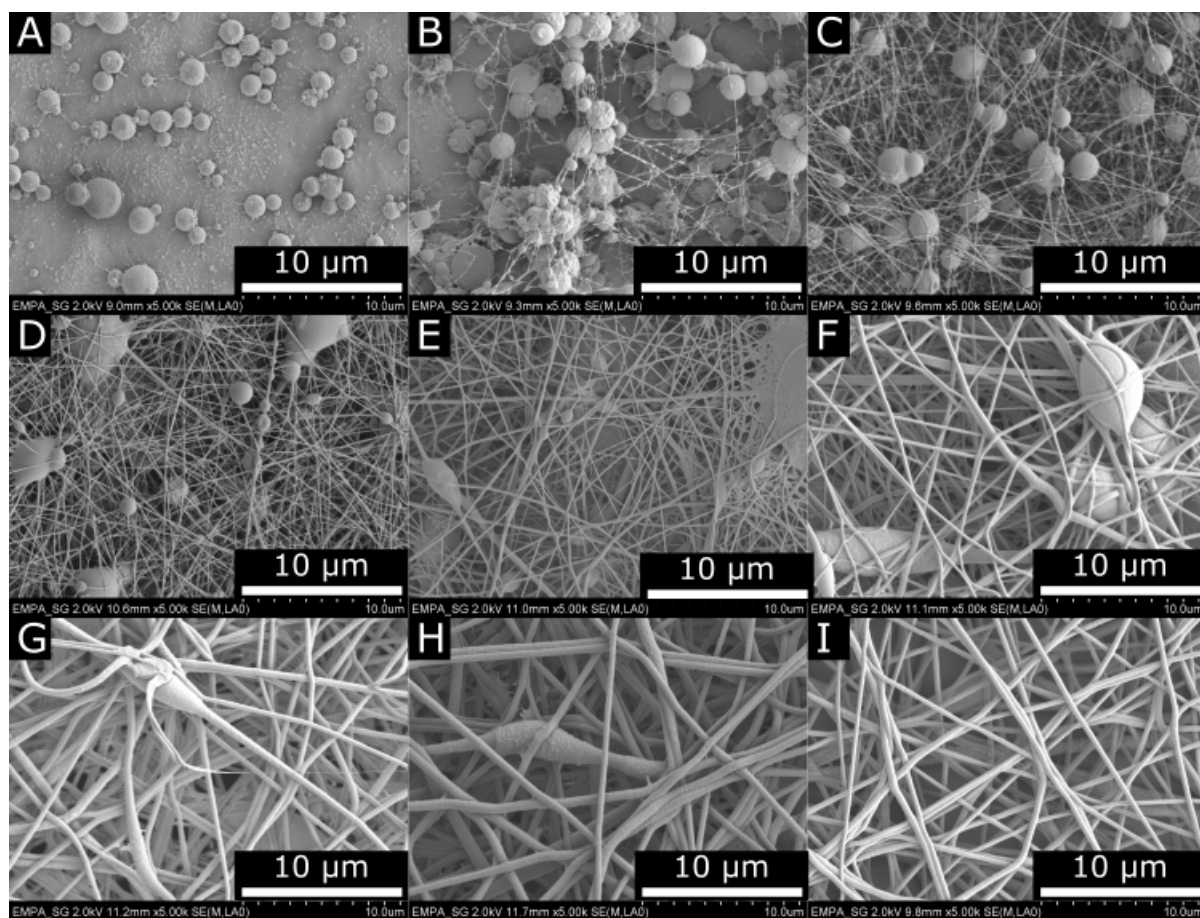

Figure S2: SEM pictures for EVOH38 electrospun nanofibers electrospun at 20 cm, 15/-5kV,  $10 \mu \text{ L.min}^{-1}$  and (A) 6, (B) 8, (C) 10, (D) 12, (E) 14, (F) 16, (G) 18, (H) 20 and (I) the fibers used in this study.

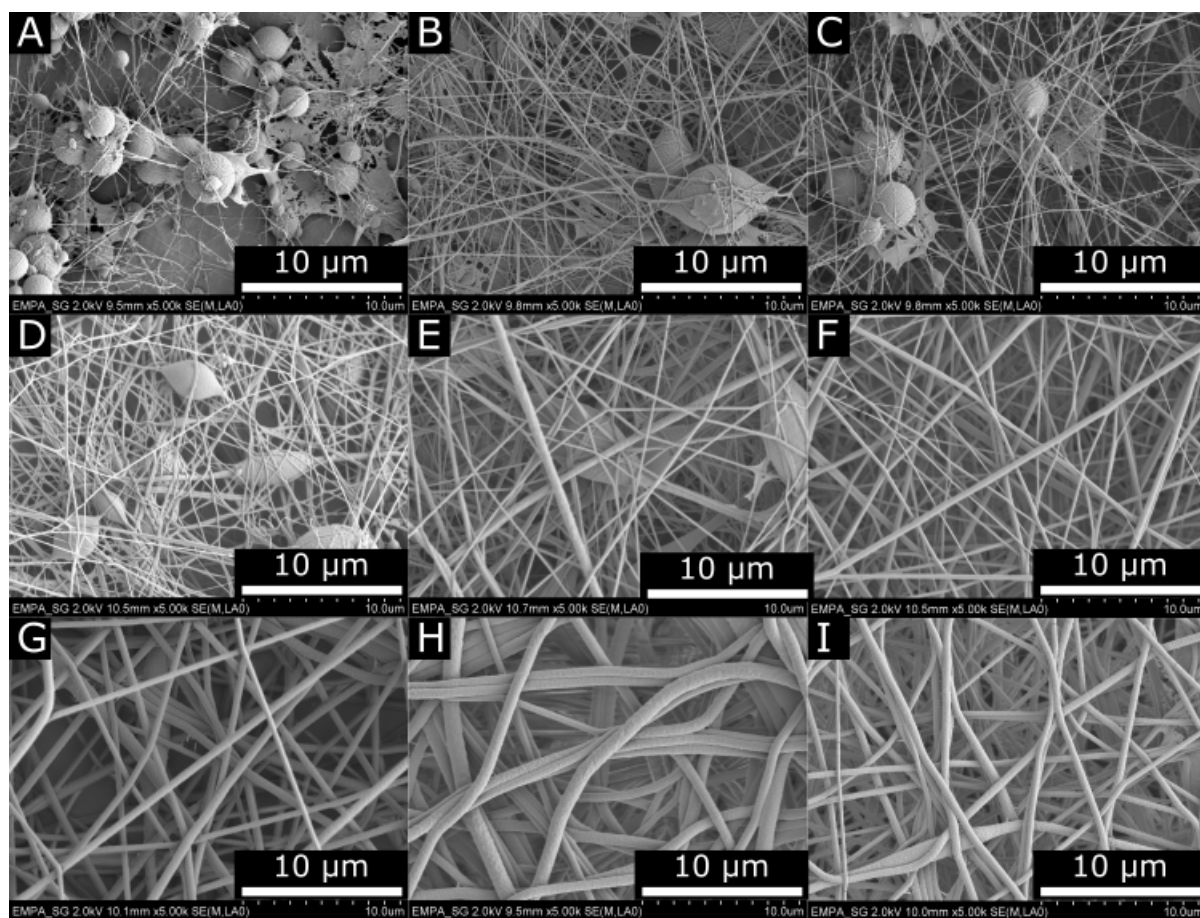

Figure S3: SEM pictures for EVOH44 electrospun nanofibers electrospun at 20 cm, 15/-5kV,  $10 \mu\text{L}\cdot\text{min}^{-1}$  and (A) 6, (B) 8, (C) 10, (D) 12 (E) 14, (F) 16, (G) 18, (H) 20 and (I) the fibers used in this study.

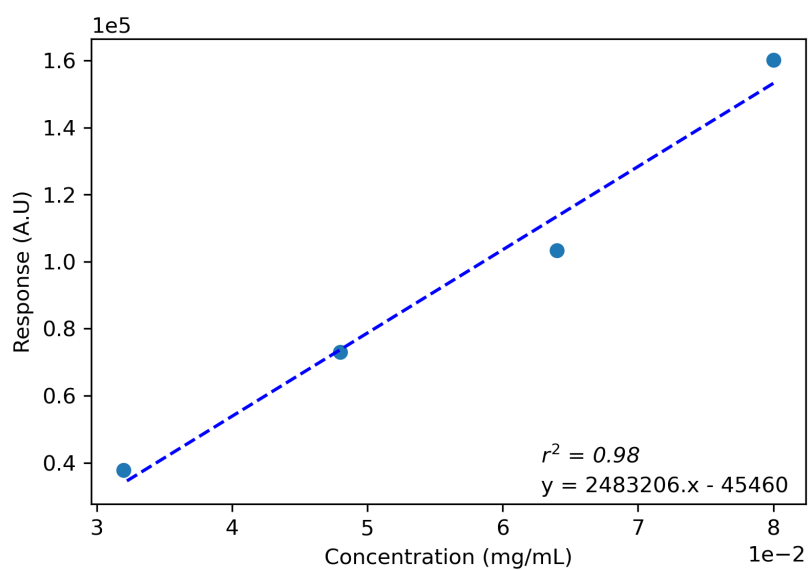

Figure S4: Calibration curve for the detection of ibuprofen in PBS.

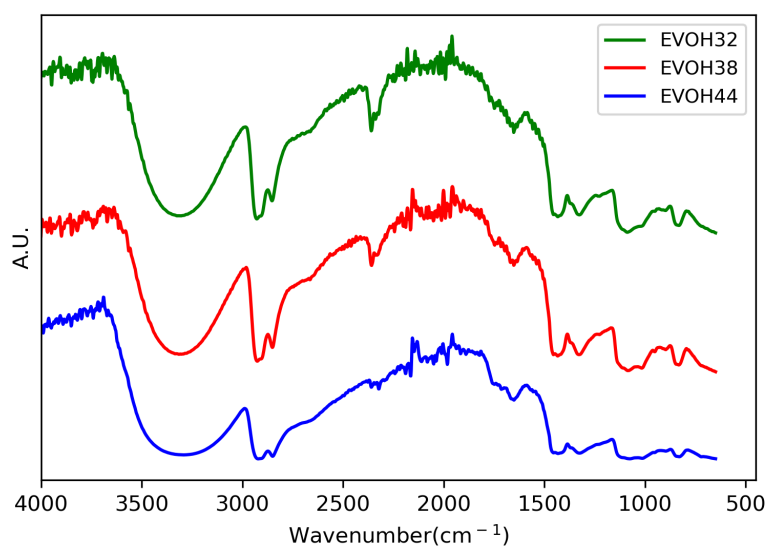

Figure S5: FTIR spectra of EVOH32, EVOH38 and EVOH44

Table S1: Apex Track integration parameters for TargetLinx method for UPLC analysis of ibuprofen

|                             |                    |
|-----------------------------|--------------------|
| Retention time              | 3.38 ± 0.2 minutes |
| Peak-to-peak baseline noise | 9772.00            |
| Peak Width at 5% Height     | 0.45 minutes       |
| Baseline Start Threshold    | 5.0%               |
| Baseline End Threshold      | 0.0%               |

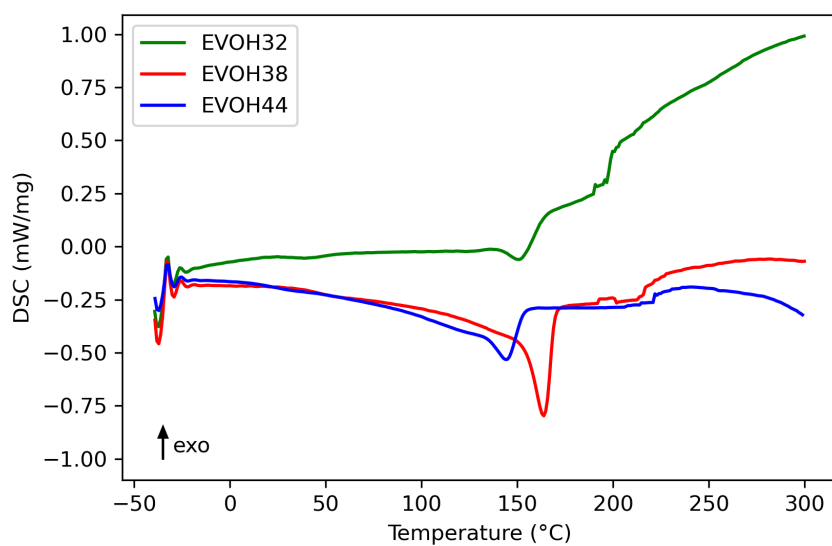

Figure S6: DSC of EVOH32, EVOH38 and EVOH44 - second heating cycle

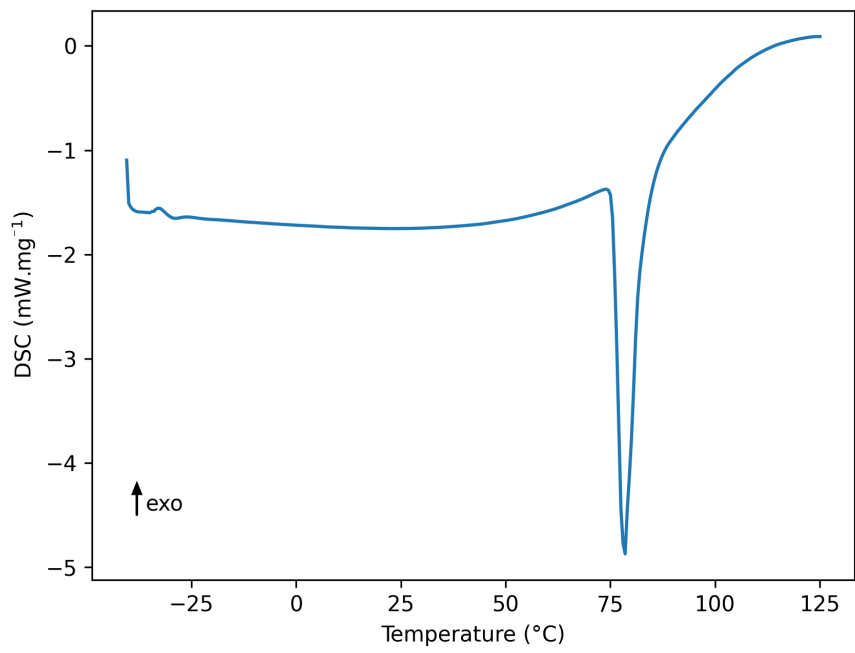

Figure S7: DSC of ibuprofen

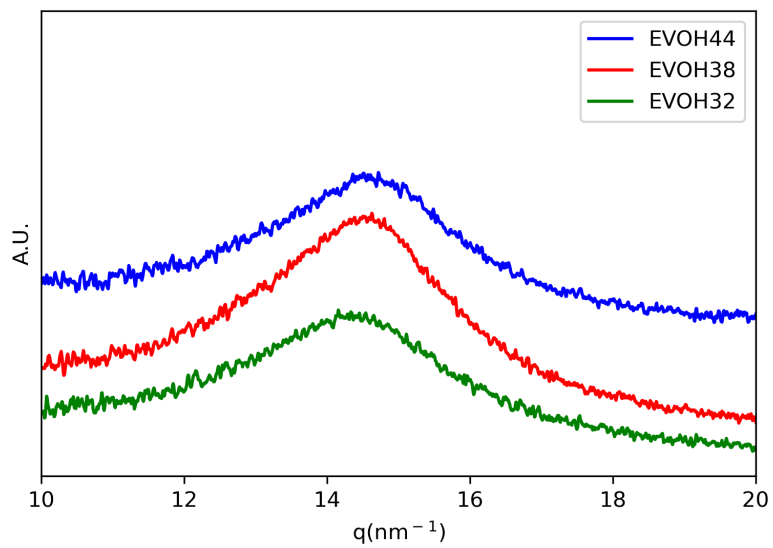

Figure S8: WAXS data of EVOH32, EVOH38 and EVOH44

Table S2: Parameters of the desorption model used to fit the drug release from EVOH32, EVOH38 and EVOH44

| Membrane | Temperature | $\alpha$ | $\tau$ | $r^2$ |
|----------|-------------|----------|--------|-------|
| EVOH32   | 25°C        | 0.77     | 0.15   | 0.99  |
|          | 37.5°C      | 0.81     | 0.18   | 0.98  |
| EVOH38   | 25°C        | 0.67     | .21    | 0.98  |
|          | 37.5°C      | 0.77     | 0.18   | 0.92  |
| EVOH44   | 25°C        | 0.49     | 0.31   | 0.91  |
|          | 37.5°C      | 0.87     | 0.24   | 0.96  |

Table S3: Statistical analysis for the release of IBU for EVOH32, EVOH38 and EVOH44 in function of temperature

| Groups               | p-value (Dunn Test) | Significance |
|----------------------|---------------------|--------------|
| EVOH32 25°C & 37.5°C | 0.000442            | **           |
| EVOH38 25°C & 37.5°C | 0.000669            | **           |
| EVOH44 25°C & 37.5°C | 2.92e-13            | **           |

Table S4: Statistical analysis for the release of IBU for EVOH32, EVOH38 and EVOH44 in function of ethylene content. (p-value of Kruskal Wallis of 3.35e-16)

| Groups                    | p-value (Dunn Test) | Significance |
|---------------------------|---------------------|--------------|
| EVOH32 25°C & EVOH38 25°C | 1.96e-3             | **           |
| EVOH38 25°C & EVOH44 25°C | 1.5e-7              | **           |
| EVOH44 25°C & EVOH32 25°C | 6.86e-17            | **           |



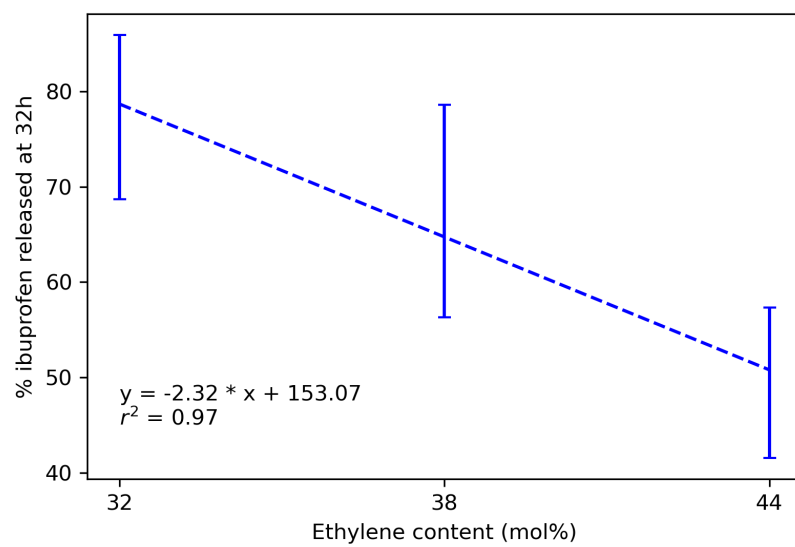

Figure S9: Amount of ibuprofen released depending on the ethylene content after 32h
